# Supplementary material for: Template synthesis of nitrogen-doped carbon nanocages–encapsulated carbon nanobubbles as catalyst for activation of peroxymonosulfate
Source: Royal Society of Chemistry journal article supplement (doi:10.1039/c8qi00256h), 2018-01-01
Supplement: c8qi00256h1.pdf [file c8qi00256h1.pdf]

## Supporting Information

Template synthesis of nitrogen-doped carbon nanocages-encapsulated carbon nanobubbles as catalyst for activation of peroxymonosulfate

Na Wang<sup>a</sup>, Wenjie Ma<sup>a</sup>, Ziqiu Ren<sup>a</sup>, Leijiang Zhang<sup>a</sup>, Rong Qiang<sup>a</sup>, Kun-Yi Andrew Lin<sup>\*\*b</sup>,  
Ping Xu<sup>a</sup>, Yunchen Du<sup>\*a</sup>, Xijiang Han<sup>\*a</sup>

<sup>a</sup>MIIT Key Laboratory of Critical Materials Technology for New Energy Conversion and Storage, School of Chemistry and Chemical Engineering, Harbin Institute of Technology, Harbin 150001, China

\*Corresponding authors. E-mail: [yunchendu@hit.edu.cn](mailto:yunchendu@hit.edu.cn) (Y. Du); [hanxijiang@hit.edu.cn](mailto:hanxijiang@hit.edu.cn) (X. Han).

Tel: +86-(451)-86418750; fax: +86-(451)-86413702.

<sup>b</sup>Department of Environmental Engineering, National Chung Hsing University, 250 Kuo-Kuang Road, Taichung, Taiwan

\*\*Corresponding authors. E-mail: [linky@nchu.edu.tw](mailto:linky@nchu.edu.tw) (K.-Y.A. Lin)

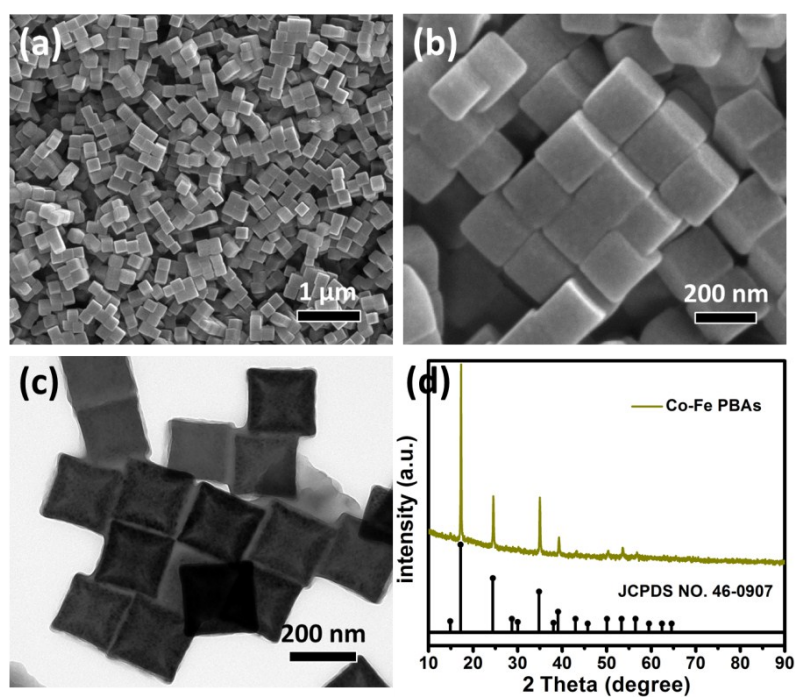

**Figure S1.** SEM, TEM and XRD patterns of Co-Fe PBAs nanocubes.

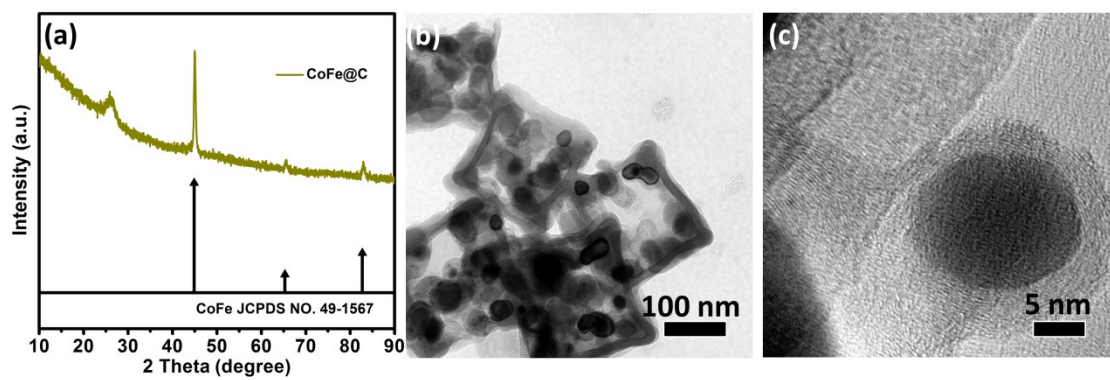

**Figure S2.** XRD and TEM patterns of CoFe@C@NCCs derived from Co-Fe PBAs@PDA.

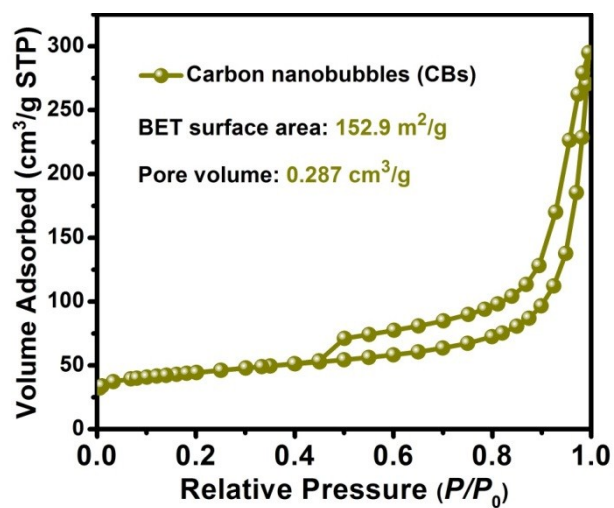

**Figure S3.**  $N_2$  adsorption-desorption isotherms, BET surface area and pore volume of CBs without nitrogen-doped carbon nanocages.

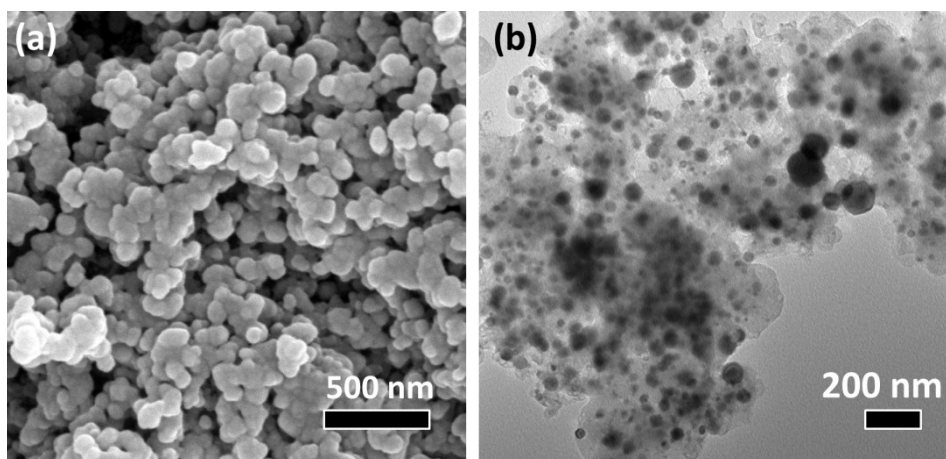

**Figure S4.** SEM and TEM images of CoFe/C nanocomposites derived from Co-Fe PBAs.

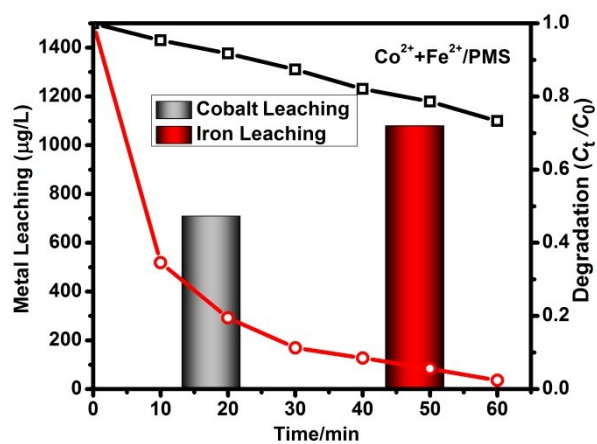

**Figure S5.** The metal leaching in MB degradation system, and MB degradation in homogeneous  $\text{Co}^{2+}+\text{Fe}^{2+}/\text{PMS}$  system. ( $[\text{Co}^{2+}] = 710 \text{ } \mu\text{g/L}$ ;  $[\text{Fe}^{2+}] = 1080 \text{ } \mu\text{g/L}$ ; MB, 100 mg/L; Oxone, 1.00 g/L; T, 288 K.)

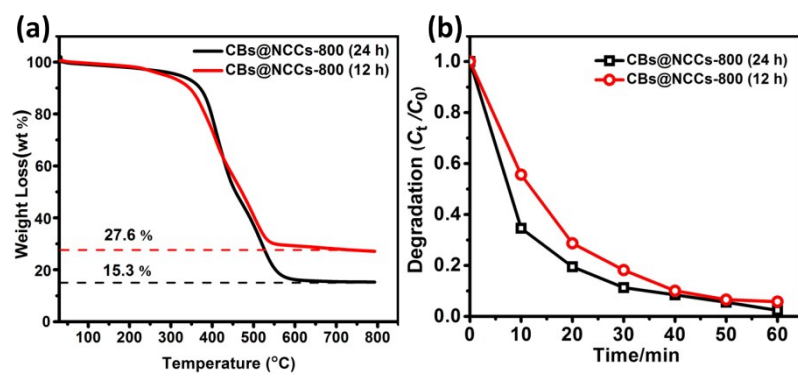

**Figure S6.** TG curves (a) and MB degradation activities (b) of CBs@NCCs-800 with different acid etching time. (MB, 100 mg/L; catalyst, 0.06 g/L; Oxone, 1.00 g/L; T, 288 K).

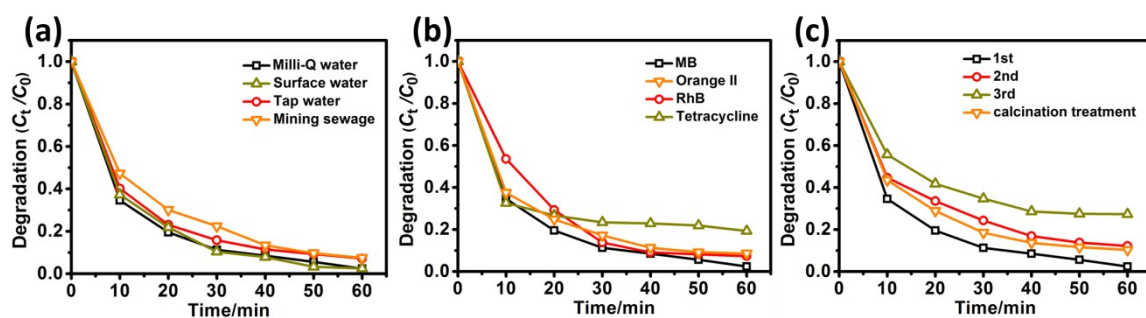

**Figure S7.** The influences of actual water bodies for the degradation of MB (a); the degradation of different organic pollutants in CBs@NCCs-800/PMS system (b); reusability and stability tests of CBs@NCCs-800 (MB, 100 mg/L; catalyst, 0.06 g/L; Oxone, 1.00 g/L; T, 288 K).
